# Supplementary material
Source: Springer Nature journal article supplement (https://www.springermedizin.de/resource/supplementary/12936_2014_3377_MOESM7_ESM.pdf/9545790)
Supplement: MOESM7 [file 9545790]

Hakizimana T3.

Table3. LLIN survivorship (%) by site, characteristics and fabric type, at one (T<sub>0</sub>), 12 (T<sub>12</sub>) and 24 (T<sub>24</sub>) months post distribution.

| Cell     | Characteristics    | LLIN type    | Observed       |                 |                 | Predicted* |
|----------|--------------------|--------------|----------------|-----------------|-----------------|------------|
|          |                    |              | T <sub>0</sub> | T <sub>12</sub> | T <sub>24</sub> |            |
| Cyimo    | peri-urban endemic | Polyester    | 100            | 89              | 64 <sup>a</sup> | 75         |
| Rusheshe |                    | Polyethylene | 100            | 93              | 84 <sup>a</sup> |            |
| Bungwe   | rural endemic      | Polyester    | 100            | 92              | 77              |            |
| Bushenya |                    | Polyethylene | 100            | 94              | 79              |            |
| Rutabo   | rural hypo-endemic | Polyester    | 100            | 95              | 70 <sup>b</sup> |            |
| Burima   |                    | Polyethylene | 100            | 90              | 78 <sup>b</sup> |            |

<sup>a,b</sup> p<0.05

\* NetCALC predicted percent of nets remaining after two years based on 3-year serviceable life assumption
